# Supplementary material for: The Preparation of Superhydrophobic Polylactic Acid Membrane with Adjustable Pore Size by Freeze Solidification Phase Separation Method for Oil–Water Separation
Source: MDPI journal article supplement (doi:10.3390/molecules28145590), 2023-07-22
Supplement: s1 [file s1]

# Supporting Information

## **The preparation of superhydrophobic polylactic acid membrane with adjustable pore size by freeze solidification phase separation method for oil-water separation**

Yan Zhang<sup>a,b</sup>, Tianyi Sun<sup>a,b\*</sup>, Dashuai Zhang<sup>a,b</sup>, Shishu Sun<sup>a,b</sup>, Jinrui Liu<sup>a,b</sup>, Bangsen Li<sup>a,b</sup> and Zaifeng Shi<sup>a,b\*</sup>

<sup>a</sup>Key Laboratory of Water Pollution Treatment & Resource Reuse, Hainan Normal University, Haikou, Hainan 571158, P.R. China

<sup>b</sup>College of Chemistry and Chemical Engineering, Hainan Normal University, Haikou, Hainan 571158, P.R. China

\* Corresponding author, Dr. Tianyi Sun e-mail: [tianyi870328@163.com](mailto:tianyi870328@163.com), Professor Dr.Zaifeng Shi e-mail: [zaifengshi@163.com](mailto:zaifengshi@163.com),

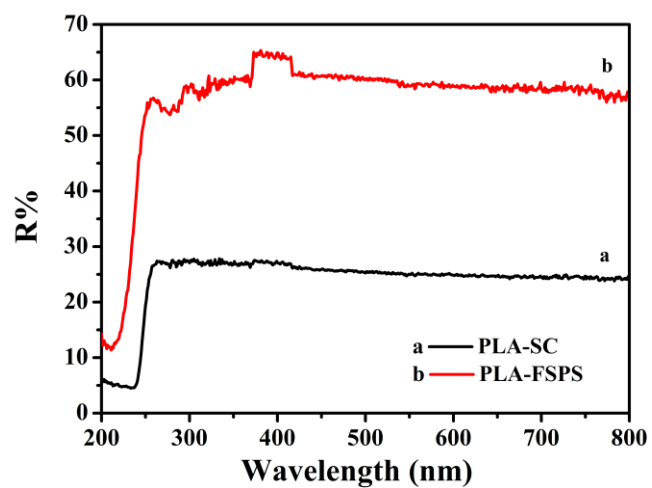

**Fig.S 1 Reflectance test of PLA-SC and PLA-FSPS.**

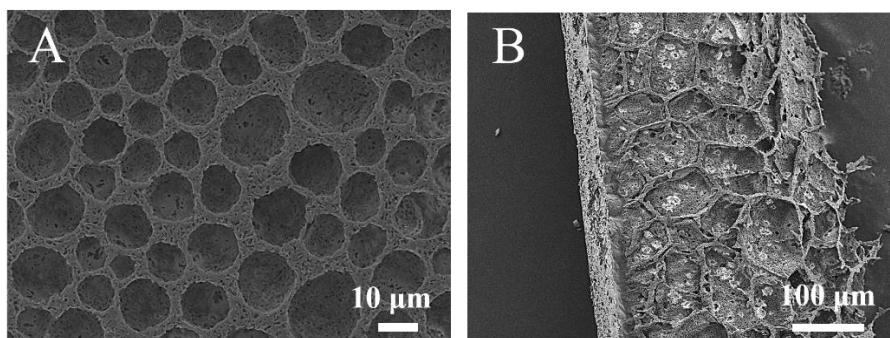

**Fig.S 2 Images of PLA-FSPS membrane surface (A) and cross-section (B).**

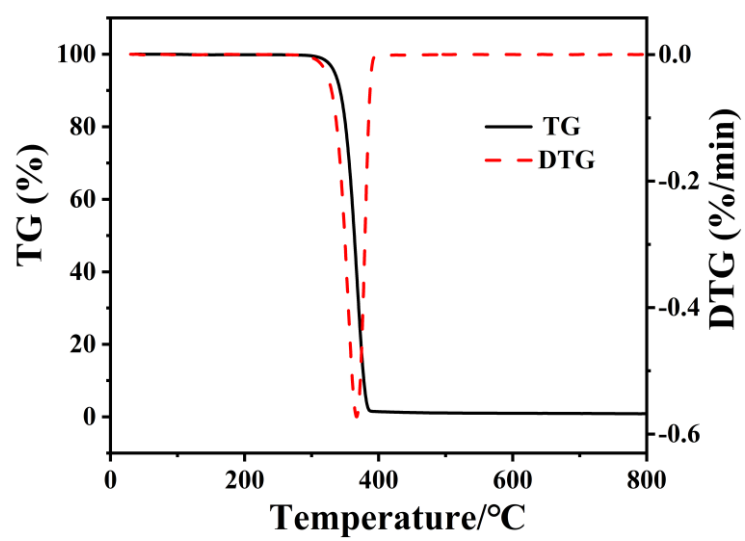

**Fig. S 3 TG and DSC curves of PLA-FSPS membrane.**

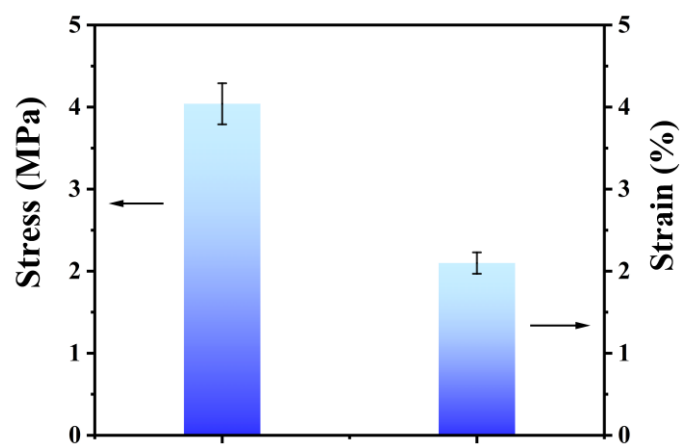

**Fig. S 4** The maximum stress and strain of PLA-FSPS membrane.

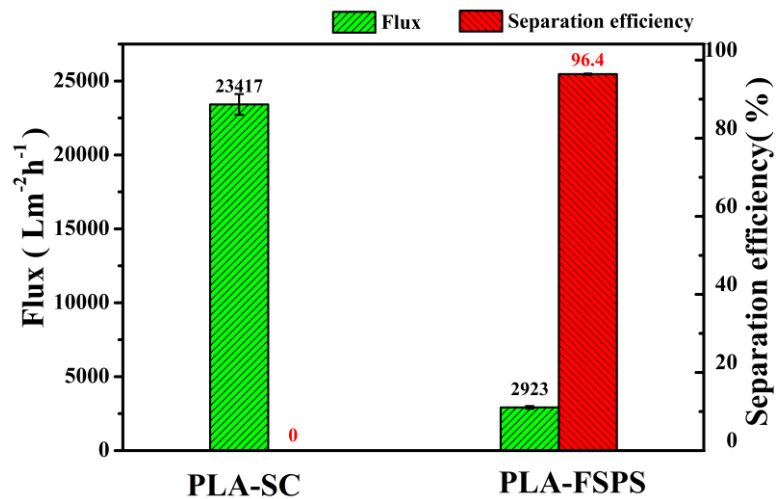

**Fig.S 5 The oil-water separation test of PLA-SC and PLA-FSPS.**

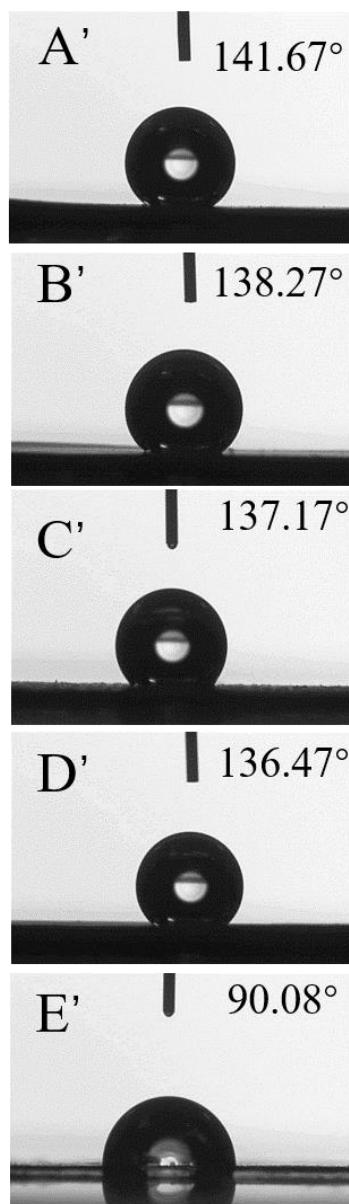

**Fig.S 6 CA test images of PLA-FSPS membranes.**

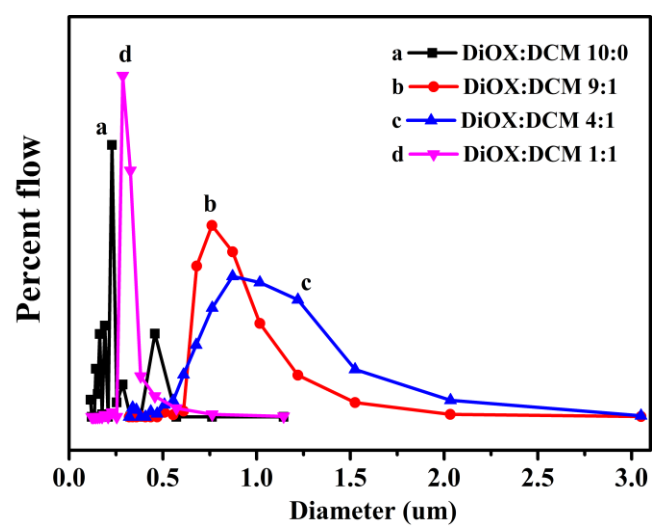

**Fig. S 7 Pore size distribution of the membranes prepared by different ratios of solvent.**



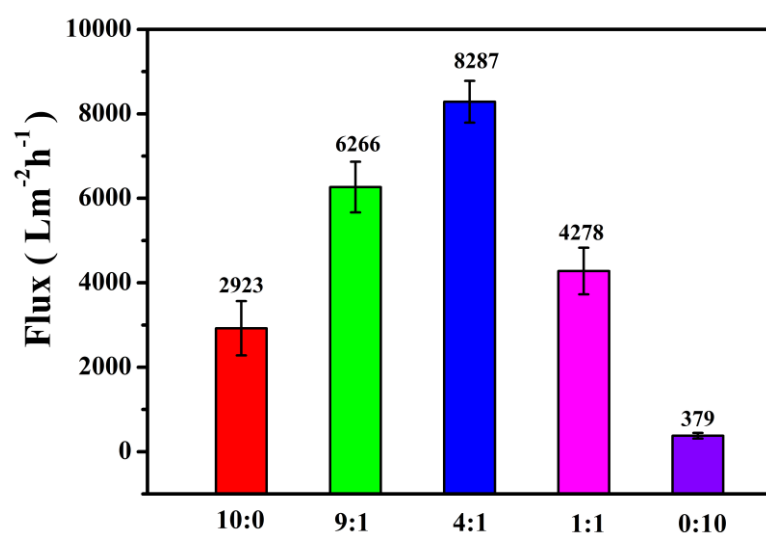

**Fig. S 8 The oil-water separation test.**

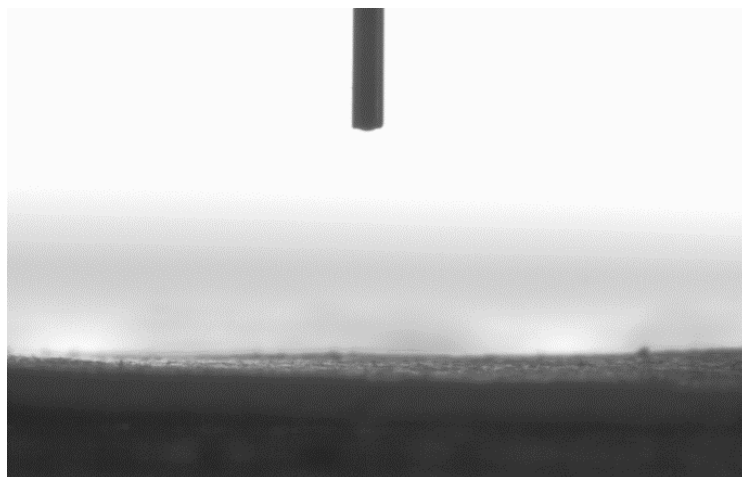

**Fig. S 9 Superoleophilicity of membrane.**

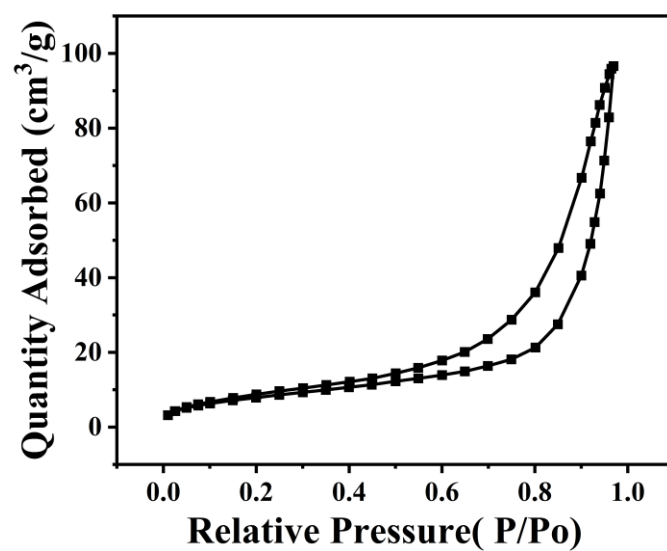

**Fig. S 10 Nitrogen adsorption-desorption isotherms of membrane.**

**Table S 1 Membrane aperture parameters of the membranes prepared by different methods**

| Specification                   | Solution casting method | Freeze-solidification<br>phase separation method |
|---------------------------------|-------------------------|--------------------------------------------------|
| Maximum aperture/ $\mu\text{m}$ | 71.30                   | 0.54                                             |
| Average aperture/ $\mu\text{m}$ | 25.86                   | 0.46                                             |
| Minimum aperture/ $\mu\text{m}$ | 2.35                    | 0.25                                             |
| Porosity/%                      | $51.01 \pm 0.07$        | $77.60 \pm 0.06$                                 |

**Table S 2 Membrane aperture parameters of the membranes with solution impregnation induced**

| <b>Specification</b>                                 | <b>No solution<br/>impregnation<br/>induction</b> | <b>Deionized<br/>water</b> | <b>Acetic acid</b> | <b>Deionized<br/>water and<br/>acetic acid<br/>1:1</b> |
|------------------------------------------------------|---------------------------------------------------|----------------------------|--------------------|--------------------------------------------------------|
| <b>Maximum<br/>aperture/<math>\mu\text{m}</math></b> | <b>8.96</b>                                       | <b>11.4</b>                | <b>11.13</b>       | <b>11.14</b>                                           |
| <b>Average<br/>aperture/<math>\mu\text{m}</math></b> | <b>1.15</b>                                       | <b>1.25</b>                | <b>3.91</b>        | <b>4.05</b>                                            |
| <b>Minimum<br/>aperture/<math>\mu\text{m}</math></b> | <b>0.48</b>                                       | <b>0.74</b>                | <b>1.00</b>        | <b>0.99</b>                                            |
